# Supplementary material for: Expanding Mouse-Adapted Yamagata-like Influenza B Viruses in Eggs Enhances In Vivo Lethality in BALB/c Mice
Source: MDPI journal article supplement (doi:10.3390/v14061299), 2022-06-14
Supplement: s1 [file s1]

Figure S1. Hemagglutinin amino acid sequence alignment of B/Florida/06.

|                            |     |                                                                                    |     |
|----------------------------|-----|------------------------------------------------------------------------------------|-----|
| B_Florida_4_06_parent_HA   | 1   | MKAIIVLLMVVTSNADRICTGITSSNSPHVVKATATQGEVNVTVGIPLTTTPTKSYFANLKGTRTRGKLCPCDCLNCTDLDV | 80  |
| B_Florida_4_06_p10_cell_HA | 1   | MKAIIVLLMVVTSNADRICTGITSSNSPHVVKATATQGEVNVTVGIPLTTTPTKSYFANLKGTRTRGKLCPCDCLNCTDLDV | 80  |
| B_Florida_4_06_p10_egg_HA  | 1   | MKAIIVLLMVVTSNADRICTGITSSNSPHVVKATATQGEVNVTVGIPLTTTPTKSYFANLKGTRTRGKLCPCDCLNCTDLDV | 80  |
| B_Florida_4_06_p20_cell_HA | 1   | MKAIIVLLMVVTSNADRICTGITSSNSPHVVKATATQGEVNVTVGIPLTTTPTKSYFANLKGTRTRGKLCPCDCLNCTDLDV | 80  |
| B_Florida_4_06_p20_egg_HA  | 1   | MKAIIVLLMVVTSNADRICTGITSSNSPHVVKATATQGEVNVTVGIPLTTTPTKSYFANLKGTRTRGKLCPCDCLNCTDLDV | 80  |
| B_Florida_4_06_parent_HA   | 81  | ALGRPMC VGTTTSAKASILHEVKPVTSGCFPIIMHRTKIRQLPNLLRGYENIRLSTQNVDAEAPGGPYRLGTSGSCPN    | 160 |
| B_Florida_4_06_p10_cell_HA | 81  | ALGRPMC VGTTTSAKASILHEVKPVTSGCFPIIMHRTKIRQLPNLLRGYENIRLSTQNVDAEAPGGPYRLGTSGSCPN    | 160 |
| B_Florida_4_06_p10_egg_HA  | 81  | ALGRPMC VGTTTSAKASILHEVKPVTSGCFPIIMHRTKIRQLPNLLRGYENIRLSTQNVDAEAPGGPYRLGTSGSCPN    | 160 |
| B_Florida_4_06_p20_cell_HA | 81  | ALGRPMC VGTTTSAKASILHEVKPVTSGCFPIIMHRTKIRQLPNLLRGYENIRLSTQNVDAEAPGGPYRLGTSGSCPN    | 160 |
| B_Florida_4_06_p20_egg_HA  | 81  | ALGRPMC VGTTTSAKASILHEVKPVTSGCFPIIMHRTKIRQLPNLLRGYENIRLSTQNVDAEAPGGPYRLGTSGSCPN    | 160 |
| B_Florida_4_06_parent_HA   | 161 | ATSKSGFFATMAWAVPKDNNKNATNPLTVEVPYICTEGEDQITVWGFHSDDKTQMKNLYGDSNPQKFTSSANGVTTHYVS   | 240 |
| B_Florida_4_06_p10_cell_HA | 161 | ATSKSGFFATMAWAVPKDNNKNATNPLTVEVPYICTEGEDQITVWGFHSDDKTQMKNLYGDSNPQKFTSSANGVTTHYVS   | 240 |
| B_Florida_4_06_p10_egg_HA  | 161 | ATSKSGFFATMAWAVPKDNNKNATNPLTVEVPYICTEGEDQITVWGFHSDDKTQMKNLYGDSNPQKFTSSANGVTTHYVS   | 240 |
| B_Florida_4_06_p20_cell_HA | 161 | ATSKSGFFATMAWAVPKDNNKNATNPLTVEVPYICTEGEDQITVWGFHSDDKTQMKNLYGDSNPQKFTSSANGVTTHYVS   | 240 |
| B_Florida_4_06_p20_egg_HA  | 161 | ATSKSGFFATMAWAVPKDNNKNATNPLTVEVPYICTEGEDQITVWGFHSDDKTQMKNLYGDSNPQKFTSSANGVTTHYVS   | 240 |
| B_Florida_4_06_parent_HA   | 241 | QIGSFDPQTEDGGLPQSGRIVVDYMMQKPGKGTGTIVYQRGVLLPQKVWCASGRSKVIKGSPLLIGEADCLHEKYGGGLNKS | 320 |
| B_Florida_4_06_p10_cell_HA | 241 | QIGSFDPQTEDGGLPQSGRIVVDYMMQKPGKGTGTIVYQRGVLLPQKVWCASGRSKVIKGSPLLIGEADCLHEKYGGGLNKS | 320 |
| B_Florida_4_06_p10_egg_HA  | 241 | QIGSFDPQTEDGGLPQSGRIVVDYMMQKPGKGTGTIVYQRGVLLPQKVWCASGRSKVIKGSPLLIGEADCLHEKYGGGLNKS | 320 |
| B_Florida_4_06_p20_cell_HA | 241 | QIGSFDPQTEDGGLPQSGRIVVDYMMQKPGKGTGTIVYQRGVLLPQKVWCASGRSKVIKGSPLLIGEADCLHEKYGGGLNKS | 320 |
| B_Florida_4_06_p20_egg_HA  | 241 | QIGSFDPQTEDGGLPQSGRIVVDYMMQKPGKGTGTIVYQRGVLLPQKVWCASGRSKVIKGSPLLIGEADCLHEKYGGGLNKS | 320 |
| B_Florida_4_06_parent_HA   | 321 | KPYTGEHAKAIGNCPIWVKTPKLKANGTKYRPPAKLLKERGFFGAIAGFLEGGWEGMIAAGWHGYTSHGAHVAVAADLK    | 400 |
| B_Florida_4_06_p10_cell_HA | 321 | KPYTGEHAKAIGNCPIWVKTPKLKANGTKYRPPAKLLKERGFFGAIAGFLEGGWEGMIAAGWHGYTSHGAHVAVAADLK    | 400 |
| B_Florida_4_06_p10_egg_HA  | 321 | KPYTGEHAKAIGNCPIWVKTPKLKANGTKYRPPAKLLKERGFFGAIAGFLEGGWEGMIAAGWHGYTSHGAHVAVAADLK    | 400 |
| B_Florida_4_06_p20_cell_HA | 321 | KPYTGEHAKAIGNCPIWVKTPKLKANGTKYRPPAKLLKERGFFGAIAGFLEGGWEGMIAAGWHGYTSHGAHVAVAADLK    | 400 |
| B_Florida_4_06_p20_egg_HA  | 321 | KPYTGEHAKAIGNCPIWVKTPKLKANGTKYRPPAKLLKERGFFGAIAGFLEGGWEGMIAAGWHGYTSHGAHVAVAADLK    | 400 |
| B_Florida_4_06_parent_HA   | 401 | STQEAINKITKNLSLSELEVKNLQRLSGAMDELHNEILELDEKVDDLADTIISSQIELAVLLSNEGIINSEDEHLLALE    | 480 |
| B_Florida_4_06_p10_cell_HA | 401 | STQEAINKITKNLSLSELEVKNLQRLSGAMDELHNEILELDEKVDDLADTIISSQIELAVLLSNEGIINSEDEHLLALE    | 480 |
| B_Florida_4_06_p10_egg_HA  | 401 | STQEAINKITKNLSLSELEVKNLQRLSGAMDELHNEILELDEKVDDLADTIISSQIELAVLLSNEGIINSEDEHLLALE    | 480 |
| B_Florida_4_06_p20_cell_HA | 401 | STQEAINKITKNLSLSELEVKNLQRLSGAMDELHNEILELDEKVDDLADTIISSQIELAVLLSNEGIINSEDEHLLALE    | 480 |
| B_Florida_4_06_p20_egg_HA  | 401 | STQEAINKITKNLSLSELEVKNLQRLSGAMDELHNEILELDEKVDDLADTIISSQIELAVLLSNEGIINSEDEHLLALE    | 480 |
| B_Florida_4_06_parent_HA   | 481 | RKLKMLGSPSAVEIGNGCFETKHKCNQTCCLDRIAAGTFNAGEFSLPTFDSLNI TAASLNDDGLDNHTILLYYSTAASSLA | 560 |
| B_Florida_4_06_p10_cell_HA | 481 | RKLKMLGSPSAVEIGNGCFETKHKCNQTCCLDRIAAGTFNAGEFSLPTFDSLNI TAASLNDDGLDNHTILLYYSTAASSLA | 560 |
| B_Florida_4_06_p10_egg_HA  | 481 | RKLKMLGSPSAVEIGNGCFETKHKCNQTCCLDRIAAGTFNAGEFSLPTFDSLNI TAASLNDDGLDNHTILLYYSTAASSLA | 560 |
| B_Florida_4_06_p20_cell_HA | 481 | RKLKMLGSPSAVEIGNGCFETKHKCNQTCCLDRIAAGTFNAGEFSLPTFDSLNI TAASLNDDGLDNHTILLYYSTAASSLA | 560 |
| B_Florida_4_06_p20_egg_HA  | 481 | RKLKMLGSPSAVEIGNGCFETKHKCNQTCCLDRIAAGTFNAGEFSLPTFDSLNI TAASLNDDGLDNHTILLYYSTAASSLA | 560 |
| B_Florida_4_06_parent_HA   | 561 | VTLM LAIFIVYMVS RDNVSCSICL                                                         | 585 |
| B_Florida_4_06_p10_cell_HA | 561 | VTLM LAIFIVYMVS RDNVSCSICL                                                         | 585 |
| B_Florida_4_06_p10_egg_HA  | 561 | VTLM LAIFIVYMVS RDNVSCSICL                                                         | 585 |
| B_Florida_4_06_p20_cell_HA | 561 | VTLM LAIFIVYMVS RDNVSCSICL                                                         | 585 |
| B_Florida_4_06_p20_egg_HA  | 561 | VTLM LAIFIVYMVS RDNVSCSICL                                                         | 585 |

Figure S2. Hemagglutinin nucleotide sequence alignment of B/Florida/06.

|                                 |      |                                                                                   |      |
|---------------------------------|------|-----------------------------------------------------------------------------------|------|
| B. Florida_4_06_parent_HA.seq   | 1    | ATTTCTTAATATCCACAAATGAAGGCAATAATGTGACTACTCTGTTGATGTAACATCCAAATGCAGATCGAATTCGCATCT | 80   |
| B. Florida_4_06_p10_cell_HA.seq | 1    | ATTTCTTAATATCCACAAATGAAGGCAATAATGTGACTACTCTGTTGATGTAACATCCAAATGCAGATCGAATTCGCATCT | 80   |
| B. Florida_4_06_p10_egg_HA      | 1    | ATTTCTTAATATCCACAAATGAAGGCAATAATGTGACTACTCTGTTGATGTAACATCCAAATGCAGATCGAATTCGCATCT | 80   |
| B. Florida_4_06_p20_cell_HA     | 1    | ATTTCTTAATATCCACAAATGAAGGCAATAATGTGACTACTCTGTTGATGTAACATCCAAATGCAGATCGAATTCGCATCT | 80   |
| B. Florida_4_06_p20_egg_HA      | 1    | ATTTCTTAATATCCACAAATGAAGGCAATAATGTGACTACTCTGTTGATGTAACATCCAAATGCAGATCGAATTCGCATCT | 80   |
| B. Florida_4_06_parent_HA.seq   | 81   | BAATAAACATCTCAAAATCACTCTCATGTGGTCAAAACAGCCACTCAAGGGAGGTCATGATGCTGTGATATACATCT     | 160  |
| B. Florida_4_06_p10_cell_HA.seq | 81   | BAATAAACATCTCAAAATCACTCTCATGTGGTCAAAACAGCCACTCAAGGGAGGTCATGATGCTGTGATATACATCT     | 160  |
| B. Florida_4_06_p10_egg_HA      | 81   | BAATAAACATCTCAAAATCACTCTCATGTGGTCAAAACAGCCACTCAAGGGAGGTCATGATGCTGTGATATACATCT     | 160  |
| B. Florida_4_06_p20_cell_HA     | 81   | BAATAAACATCTCAAAATCACTCTCATGTGGTCAAAACAGCCACTCAAGGGAGGTCATGATGCTGTGATATACATCT     | 160  |
| B. Florida_4_06_p20_egg_HA      | 81   | BAATAAACATCTCAAAATCACTCTCATGTGGTCAAAACAGCCACTCAAGGGAGGTCATGATGCTGTGATATACATCT     | 160  |
| B. Florida_4_06_parent_HA.seq   | 161  | ACCAACCAACCAACAAATCTTATTTTGGCAATCTCAAAGGAACAGGACAGAGGGAACATATGCCCCAGACTGCTTCAA    | 240  |
| B. Florida_4_06_p10_cell_HA.seq | 161  | ACCAACCAACCAACAAATCTTATTTTGGCAATCTCAAAGGAACAGGACAGAGGGAACATATGCCCCAGACTGCTTCAA    | 240  |
| B. Florida_4_06_p10_egg_HA      | 161  | ACCAACCAACCAACAAATCTTATTTTGGCAATCTCAAAGGAACAGGACAGAGGGAACATATGCCCCAGACTGCTTCAA    | 240  |
| B. Florida_4_06_p20_cell_HA     | 161  | ACCAACCAACCAACAAATCTTATTTTGGCAATCTCAAAGGAACAGGACAGAGGGAACATATGCCCCAGACTGCTTCAA    | 240  |
| B. Florida_4_06_p20_egg_HA      | 161  | ACCAACCAACCAACAAATCTTATTTTGGCAATCTCAAAGGAACAGGACAGAGGGAACATATGCCCCAGACTGCTTCAA    | 240  |
| B. Florida_4_06_parent_HA.seq   | 241  | CTCCAGAGATCTGGATGTGGCTTTGGGGAGCCAAATGTGTGGGGACCACACCTTGGCGAAGCTCTCAATCTTCCAG      | 320  |
| B. Florida_4_06_p10_cell_HA.seq | 241  | CTCCAGAGATCTGGATGTGGCTTTGGGGAGCCAAATGTGTGGGGACCACACCTTGGCGAAGCTCTCAATCTTCCAG      | 320  |
| B. Florida_4_06_p10_egg_HA      | 241  | CTCCAGAGATCTGGATGTGGCTTTGGGGAGCCAAATGTGTGGGGACCACACCTTGGCGAAGCTCTCAATCTTCCAG      | 320  |
| B. Florida_4_06_p20_cell_HA     | 241  | CTCCAGAGATCTGGATGTGGCTTTGGGGAGCCAAATGTGTGGGGACCACACCTTGGCGAAGCTCTCAATCTTCCAG      | 320  |
| B. Florida_4_06_p20_egg_HA      | 241  | CTCCAGAGATCTGGATGTGGCTTTGGGGAGCCAAATGTGTGGGGACCACACCTTGGCGAAGCTCTCAATCTTCCAG      | 320  |
| B. Florida_4_06_parent_HA.seq   | 321  | AGGTCAAACTCTTACATCCGGGTGCTTCTCTATATGACGACGAGAACAAAAATGCGCAATACCCCAATCTTCTCAGA     | 400  |
| B. Florida_4_06_p10_cell_HA.seq | 321  | AGGTCAAACTCTTACATCCGGGTGCTTCTCTATATGACGACGAGAACAAAAATGCGCAATACCCCAATCTTCTCAGA     | 400  |
| B. Florida_4_06_p10_egg_HA      | 321  | AGGTCAAACTCTTACATCCGGGTGCTTCTCTATATGACGACGAGAACAAAAATGCGCAATACCCCAATCTTCTCAGA     | 400  |
| B. Florida_4_06_p20_cell_HA     | 321  | AGGTCAAACTCTTACATCCGGGTGCTTCTCTATATGACGACGAGAACAAAAATGCGCAATACCCCAATCTTCTCAGA     | 400  |
| B. Florida_4_06_p20_egg_HA      | 321  | AGGTCAAACTCTTACATCCGGGTGCTTCTCTATATGACGACGAGAACAAAAATGCGCAATACCCCAATCTTCTCAGA     | 400  |
| B. Florida_4_06_parent_HA.seq   | 401  | GGATATGAATAATCAGGCTATCAACCCAAAGCTCATGATGTGGGAAAGGACACAGGAGGACCTACAGACTTGGAA       | 480  |
| B. Florida_4_06_p10_cell_HA.seq | 401  | GGATATGAATAATCAGGCTATCAACCCAAAGCTCATGATGTGGGAAAGGACACAGGAGGACCTACAGACTTGGAA       | 480  |
| B. Florida_4_06_p10_egg_HA      | 401  | GGATATGAATAATCAGGCTATCAACCCAAAGCTCATGATGTGGGAAAGGACACAGGAGGACCTACAGACTTGGAA       | 480  |
| B. Florida_4_06_p20_cell_HA     | 401  | GGATATGAATAATCAGGCTATCAACCCAAAGCTCATGATGTGGGAAAGGACACAGGAGGACCTACAGACTTGGAA       | 480  |
| B. Florida_4_06_p20_egg_HA      | 401  | GGATATGAATAATCAGGCTATCAACCCAAAGCTCATGATGTGGGAAAGGACACAGGAGGACCTACAGACTTGGAA       | 480  |
| B. Florida_4_06_parent_HA.seq   | 481  | CTCAGAGATCTTGCCCTTAAGCTTACCAATGAAGAGGGATTTTGGCAACATGGCTTGGGCTGTCCCAAGGACCAACA     | 560  |
| B. Florida_4_06_p10_cell_HA.seq | 481  | CTCAGAGATCTTGCCCTTAAGCTTACCAATGAAGAGGGATTTTGGCAACATGGCTTGGGCTGTCCCAAGGACCAACA     | 560  |
| B. Florida_4_06_p10_egg_HA      | 481  | CTCAGAGATCTTGCCCTTAAGCTTACCAATGAAGAGGGATTTTGGCAACATGGCTTGGGCTGTCCCAAGGACCAACA     | 560  |
| B. Florida_4_06_p20_cell_HA     | 481  | CTCAGAGATCTTGCCCTTAAGCTTACCAATGAAGAGGGATTTTGGCAACATGGCTTGGGCTGTCCCAAGGACCAACA     | 560  |
| B. Florida_4_06_p20_egg_HA      | 481  | CTCAGAGATCTTGCCCTTAAGCTTACCAATGAAGAGGGATTTTGGCAACATGGCTTGGGCTGTCCCAAGGACCAACA     | 560  |
| B. Florida_4_06_parent_HA.seq   | 561  | AAAAATGCAAGACCCCACTAACAGTAGAGTACCATACTTTGTACAGAAAGGGAAGACCAATCACTGTTGGGGTTTC      | 640  |
| B. Florida_4_06_p10_cell_HA.seq | 561  | AAAAATGCAAGACCCCACTAACAGTAGAGTACCATACTTTGTACAGAAAGGGAAGACCAATCACTGTTGGGGTTTC      | 640  |
| B. Florida_4_06_p10_egg_HA      | 561  | AAAAATGCAAGACCCCACTAACAGTAGAGTACCATACTTTGTACAGAAAGGGAAGACCAATCACTGTTGGGGTTTC      | 640  |
| B. Florida_4_06_p20_cell_HA     | 561  | AAAAATGCAAGACCCCACTAACAGTAGAGTACCATACTTTGTACAGAAAGGGAAGACCAATCACTGTTGGGGTTTC      | 640  |
| B. Florida_4_06_p20_egg_HA      | 561  | AAAAATGCAAGACCCCACTAACAGTAGAGTACCATACTTTGTACAGAAAGGGAAGACCAATCACTGTTGGGGTTTC      | 640  |
| B. Florida_4_06_parent_HA.seq   | 641  | CAATTCAGATGCAAAAATCAATGAAGAACCTCTATGGAGACCTCAATCTCTCAAAAGTTCACCTCTGCTTAATGGAGT    | 720  |
| B. Florida_4_06_p10_cell_HA.seq | 641  | CAATTCAGATGCAAAAATCAATGAAGAACCTCTATGGAGACCTCAATCTCTCAAAAGTTCACCTCTGCTTAATGGAGT    | 720  |
| B. Florida_4_06_p10_egg_HA      | 641  | CAATTCAGATGCAAAAATCAATGAAGAACCTCTATGGAGACCTCAATCTCTCAAAAGTTCACCTCTGCTTAATGGAGT    | 720  |
| B. Florida_4_06_p20_cell_HA     | 641  | CAATTCAGATGCAAAAATCAATGAAGAACCTCTATGGAGACCTCAATCTCTCAAAAGTTCACCTCTGCTTAATGGAGT    | 720  |
| B. Florida_4_06_p20_egg_HA      | 641  | CAATTCAGATGCAAAAATCAATGAAGAACCTCTATGGAGACCTCAATCTCTCAAAAGTTCACCTCTGCTTAATGGAGT    | 720  |
| B. Florida_4_06_parent_HA.seq   | 721  | AACCCACACACTATGTTCTCAGATTTGGGAGCTTCCAGATCAAAAGGAAGAGGGAGCTACCAACAAAGGGGAGATTT     | 800  |
| B. Florida_4_06_p10_cell_HA.seq | 721  | AACCCACACACTATGTTCTCAGATTTGGGAGCTTCCAGATCAAAAGGAAGAGGGAGCTACCAACAAAGGGGAGATTT     | 800  |
| B. Florida_4_06_p10_egg_HA      | 721  | AACCCACACACTATGTTCTCAGATTTGGGAGCTTCCAGATCAAAAGGAAGAGGGAGCTACCAACAAAGGGGAGATTT     | 800  |
| B. Florida_4_06_p20_cell_HA     | 721  | AACCCACACACTATGTTCTCAGATTTGGGAGCTTCCAGATCAAAAGGAAGAGGGAGCTACCAACAAAGGGGAGATTT     | 800  |
| B. Florida_4_06_p20_egg_HA      | 721  | AACCCACACACTATGTTCTCAGATTTGGGAGCTTCCAGATCAAAAGGAAGAGGGAGCTACCAACAAAGGGGAGATTT     | 800  |
| B. Florida_4_06_parent_HA.seq   | 801  | CTGTGATACATATGTCGCAAAAATGGGAAACAGGAATTTGTCTACCAAAAGAGTGTCTTGTGCTCTCAAAAGT         | 880  |
| B. Florida_4_06_p10_cell_HA.seq | 801  | CTGTGATACATATGTCGCAAAAATGGGAAACAGGAATTTGTCTACCAAAAGAGTGTCTTGTGCTCTCAAAAGT         | 880  |
| B. Florida_4_06_p10_egg_HA      | 801  | CTGTGATACATATGTCGCAAAAATGGGAAACAGGAATTTGTCTACCAAAAGAGTGTCTTGTGCTCTCAAAAGT         | 880  |
| B. Florida_4_06_p20_cell_HA     | 801  | CTGTGATACATATGTCGCAAAAATGGGAAACAGGAATTTGTCTACCAAAAGAGTGTCTTGTGCTCTCAAAAGT         | 880  |
| B. Florida_4_06_p20_egg_HA      | 801  | CTGTGATACATATGTCGCAAAAATGGGAAACAGGAATTTGTCTACCAAAAGAGTGTCTTGTGCTCTCAAAAGT         | 880  |
| B. Florida_4_06_parent_HA.seq   | 881  | TGGTGGCGAGTGGCGAGGAGCAAGTATAAAGAGGCTCTTGCTTTAAATTTGGTGAAGCAGATTTGCTCTCATGAATAAT   | 960  |
| B. Florida_4_06_p10_cell_HA.seq | 881  | TGGTGGCGAGTGGCGAGGAGCAAGTATAAAGAGGCTCTTGCTTTAAATTTGGTGAAGCAGATTTGCTCTCATGAATAAT   | 960  |
| B. Florida_4_06_p10_egg_HA      | 881  | TGGTGGCGAGTGGCGAGGAGCAAGTATAAAGAGGCTCTTGCTTTAAATTTGGTGAAGCAGATTTGCTCTCATGAATAAT   | 960  |
| B. Florida_4_06_p20_cell_HA     | 881  | TGGTGGCGAGTGGCGAGGAGCAAGTATAAAGAGGCTCTTGCTTTAAATTTGGTGAAGCAGATTTGCTCTCATGAATAAT   | 960  |
| B. Florida_4_06_p20_egg_HA      | 881  | TGGTGGCGAGTGGCGAGGAGCAAGTATAAAGAGGCTCTTGCTTTAAATTTGGTGAAGCAGATTTGCTCTCATGAATAAT   | 960  |
| B. Florida_4_06_parent_HA.seq   | 961  | TGGTGGATTAACAAAGAGCAAGCTTACACACAGGAGAACATGCAAAAGCATAGGAAATGGCCCAATATGGGTGAATA     | 1040 |
| B. Florida_4_06_p10_cell_HA.seq | 961  | TGGTGGATTAACAAAGAGCAAGCTTACACACAGGAGAACATGCAAAAGCATAGGAAATGGCCCAATATGGGTGAATA     | 1040 |
| B. Florida_4_06_p10_egg_HA      | 961  | TGGTGGATTAACAAAGAGCAAGCTTACACACAGGAGAACATGCAAAAGCATAGGAAATGGCCCAATATGGGTGAATA     | 1040 |
| B. Florida_4_06_p20_cell_HA     | 961  | TGGTGGATTAACAAAGAGCAAGCTTACACACAGGAGAACATGCAAAAGCATAGGAAATGGCCCAATATGGGTGAATA     | 1040 |
| B. Florida_4_06_p20_egg_HA      | 961  | TGGTGGATTAACAAAGAGCAAGCTTACACACAGGAGAACATGCAAAAGCATAGGAAATGGCCCAATATGGGTGAATA     | 1040 |
| B. Florida_4_06_parent_HA.seq   | 1041 | CACCTTTGAAGCTTGGCAATGGAGCAAAATATAGACTCTGCGAAACATATAAGGAAGAGGGGTCTCTCGGAGCTATT     | 1120 |
| B. Florida_4_06_p10_cell_HA.seq | 1041 | CACCTTTGAAGCTTGGCAATGGAGCAAAATATAGACTCTGCGAAACATATAAGGAAGAGGGGTCTCTCGGAGCTATT     | 1120 |
| B. Florida_4_06_p10_egg_HA      | 1041 | CACCTTTGAAGCTTGGCAATGGAGCAAAATATAGACTCTGCGAAACATATAAGGAAGAGGGGTCTCTCGGAGCTATT     | 1120 |
| B. Florida_4_06_p20_cell_HA     | 1041 | CACCTTTGAAGCTTGGCAATGGAGCAAAATATAGACTCTGCGAAACATATAAGGAAGAGGGGTCTCTCGGAGCTATT     | 1120 |
| B. Florida_4_06_p20_egg_HA      | 1041 | CACCTTTGAAGCTTGGCAATGGAGCAAAATATAGACTCTGCGAAACATATAAGGAAGAGGGGTCTCTCGGAGCTATT     | 1120 |
| B. Florida_4_06_parent_HA.seq   | 1121 | CTGTGTTCTCTAGAGAGGAGATGGGAAGGATATGTGAGGTGTCGACAGGATACACATCTCAGGAGACATATGGATGGT    | 1200 |
| B. Florida_4_06_p10_cell_HA.seq | 1121 | CTGTGTTCTCTAGAGAGGAGATGGGAAGGATATGTGAGGTGTCGACAGGATACACATCTCAGGAGACATATGGATGGT    | 1200 |
| B. Florida_4_06_p10_egg_HA      | 1121 | CTGTGTTCTCTAGAGAGGAGATGGGAAGGATATGTGAGGTGTCGACAGGATACACATCTCAGGAGACATATGGATGGT    | 1200 |
| B. Florida_4_06_p20_cell_HA     | 1121 | CTGTGTTCTCTAGAGAGGAGATGGGAAGGATATGTGAGGTGTCGACAGGATACACATCTCAGGAGACATATGGATGGT    | 1200 |
| B. Florida_4_06_p20_egg_HA      | 1121 | CTGTGTTCTCTAGAGAGGAGATGGGAAGGATATGTGAGGTGTCGACAGGATACACATCTCAGGAGACATATGGATGGT    | 1200 |
| B. Florida_4_06_parent_HA.seq   | 1201 | AGTGGCGGGGACCTTAAGATATGCAAGAGACTATAAACAAGATAACAAAAATCTCAATCTTTGATGGAGCTAGAA       | 1280 |
| B. Florida_4_06_p10_cell_HA.seq | 1201 | AGTGGCGGGGACCTTAAGATATGCAAGAGACTATAAACAAGATAACAAAAATCTCAATCTTTGATGGAGCTAGAA       | 1280 |
| B. Florida_4_06_p10_egg_HA      | 1201 | AGTGGCGGGGACCTTAAGATATGCAAGAGACTATAAACAAGATAACAAAAATCTCAATCTTTGATGGAGCTAGAA       | 1280 |
| B. Florida_4_06_p20_cell_HA     | 1201 | AGTGGCGGGGACCTTAAGATATGCAAGAGACTATAAACAAGATAACAAAAATCTCAATCTTTGATGGAGCTAGAA       | 1280 |
| B. Florida_4_06_p20_egg_HA      | 1201 | AGTGGCGGGGACCTTAAGATATGCAAGAGACTATAAACAAGATAACAAAAATCTCAATCTTTGATGGAGCTAGAA       | 1280 |
| B. Florida_4_06_parent_HA.seq   | 1281 | TAAAGAATCTCTCAAGACTAAGTGTGTCATGGATGAACCTCCACAGAAATCTCGAGCTGGTGAAGAAAGTGGATGAT     | 1360 |
| B. Florida_4_06_p10_cell_HA.seq | 1281 | TAAAGAATCTCTCAAGACTAAGTGTGTCATGGATGAACCTCCACAGAAATCTCGAGCTGGTGAAGAAAGTGGATGAT     | 1360 |
| B. Florida_4_06_p10_egg_HA      | 1281 | TAAAGAATCTCTCAAGACTAAGTGTGTCATGGATGAACCTCCACAGAAATCTCGAGCTGGTGAAGAAAGTGGATGAT     | 1360 |
| B. Florida_4_06_p20_cell_HA     | 1281 | TAAAGAATCTCTCAAGACTAAGTGTGTCATGGATGAACCTCCACAGAAATCTCGAGCTGGTGAAGAAAGTGGATGAT     | 1360 |
| B. Florida_4_06_p20_egg_HA      | 1281 | TAAAGAATCTCTCAAGACTAAGTGTGTCATGGATGAACCTCCACAGAAATCTCGAGCTGGTGAAGAAAGTGGATGAT     | 1360 |
| B. Florida_4_06_parent_HA.seq   | 1361 | CTCAGAGCTGACATAAAGCTCGCAATAAGACTTGCAGCTCTGCTTCCACAGGAAGATAATAAACAGTGAAGATGA       | 1440 |
| B. Florida_4_06_p10_cell_HA.seq | 1361 | CTCAGAGCTGACATAAAGCTCGCAATAAGACTTGCAGCTCTGCTTCCACAGGAAGATAATAAACAGTGAAGATGA       | 1440 |
| B. Florida_4_06_p10_egg_HA      | 1361 | CTCAGAGCTGACATAAAGCTCGCAATAAGACTTGCAGCTCTGCTTCCACAGGAAGATAATAAACAGTGAAGATGA       | 1440 |
| B. Florida_4_06_p20_cell_HA     | 1361 | CTCAGAGCTGACATAAAGCTCGCAATAAGACTTGCAGCTCTGCTTCCACAGGAAGATAATAAACAGTGAAGATGA       | 1440 |
| B. Florida_4_06_p20_egg_HA      | 1361 | CTCAGAGCTGACATAAAGCTCGCAATAAGACTTGCAGCTCTGCTTCCACAGGAAGATAATAAACAGTGAAGATGA       | 1440 |
| B. Florida_4_06_parent_HA.seq   | 1441 | GCATCTATTGGCACTTGGAGGAAATATAAGAAATATGGGTCCTCTGCTGTAGATATAGGAATGGATGCTTCCAA        | 1520 |
| B. Florida_4_06_p10_cell_HA.seq | 1441 | GCATCTATTGGCACTTGGAGGAAATATAAGAAATATGGGTCCTCTGCTGTAGATATAGGAATGGATGCTTCCAA        | 1520 |
| B. Florida_4_06_p10_egg_HA      | 1441 | GCATCTATTGGCACTTGGAGGAAATATAAGAAATATGGGTCCTCTGCTGTAGATATAGGAATGGATGCTTCCAA        | 1520 |
| B. Florida_4_06_p20_cell_HA     | 1441 | GCATCTATTGGCACTTGGAGGAAATATAAGAAATATGGGTCCTCTGCTGTAGATATAGGAATGGATGCTTCCAA        | 1520 |
| B. Florida_4_06_p20_egg_HA      | 1441 | GCATCTATTGGCACTTGGAGGAAATATAAGAAATATGGGTCCTCTGCTGTAGATATAGGAATGGATGCTTCCAA        | 1520 |
| B. Florida_4_06_parent_HA.seq   | 1521 | CTCAACACAGTGGCAACAGACTTGTATAGAGGATAGCTGTGGCACTTTAATGAGGAATTTCTCTCCCACT            | 1600 |
| B. Florida_4_06_p10_cell_HA.seq | 1521 | CTCAACACAGTGGCAACAGACTTGTATAGAGGATAGCTGTGGCACTTTAATGAGGAATTTCTCTCCCACT            | 1600 |
| B. Florida_4_06_p10_egg_HA      | 1521 | CTCAACACAGTGGCAACAGACTTGTATAGAGGATAGCTGTGGCACTTTAATGAGGAATTTCTCTCCCACT            | 1600 |
| B. Florida_4_06_p20_cell_HA     | 1521 | CTCAACACAGTGGCAACAGACTTGTATAGAGGATAGCTGTGGCACTTTAATGAGGAATTTCTCTCCCACT            | 1600 |
| B. Florida_4_06_p20_egg_HA      | 1521 | CTCAACACAGTGGCAACAGACTTGTATAGAGGATAGCTGTGGCACTTTAATGAGGAATTTCTCTCCCACT            | 1600 |
| B. Florida_4_06_parent_HA.seq   | 1601 | TTTGATCTCACTGAACATCTCTGTGCTATCTTAATGATGATGGATGGTGAACATATCATCTGCTTATCTCTCAAC       | 1680 |
| B. Florida_4_06_p10_cell_HA.seq | 1601 | TTTGATCTCACTGAACATCTCTGTGCTATCTTAATGATGATGGATGGTGAACATATCATCTGCTTATCTCTCAAC       | 1680 |
| B. Florida_4_06_p10_egg_HA      | 1601 | TTTGATCTCACTGAACATCTCTGTGCTATCTTAATGATGATGGATGGTGAACATATCATCTGCTTATCTCTCAAC       | 1680 |
| B. Florida_4_06_p20_cell_HA     | 1601 | TTTGATCTCACTGAACATCTCTGTGCTATCTTAATGATGATGGATGGTGAACATATCATCTGCTTATCTCTCAAC       | 1680 |
| B. Florida_4_06_p20_egg_HA      | 1601 | TTTGATCTCACTGAACATCTCTGTGCTATCTTAATGATGATGGATGGTGAACATATCATCTGCTTATCTCTCAAC       | 1680 |
| B. Florida_4_06_parent_HA.seq   | 1681 | TCGTGCTCTTAAGTGGGCTAAACATGTATGTGACTATTTATGTTTATATGGTCTCCAGAGAACCTGTTCTACCTG       | 1760 |
| B. Florida_4_06_p10_cell_HA.seq | 1681 | TCGTGCTCTTAAGTGGGCTAAACATGTATGTGACTATTTATGTTTATATGGTCTCCAGAGAACCTGTTCTACCTG       | 1760 |
| B. Florida_4_06_p10_egg_HA      | 1681 | TCGTGCTCTTAAGTGGGCTAAACATGTATGTGACTATTTATGTTTATATGGTCTCCAGAGAACCTGTTCTACCTG       | 1760 |
| B. Florida_4_06_p20_cell_HA     | 1681 | TCGTGCTCTTAAGTGGGCTAAACATGTATGTGACTATTTATGTTTATATGGTCTCCAGAGAACCTGTTCTACCTG       | 1760 |
| B. Florida_4_06_p20_egg_HA      | 1681 | TCGTGCTCTTAAGTGGGCTAAACATGTATGTGACTATTTATGTTTATATGGTCTCCAGAGAACCTGTTCTACCTG       | 1760 |
| B. Florida_4_06_parent_HA.seq   | 1761 | CCATCTGCTATAAGGAAGATAGGCTCTGATTTCTCTTATTTGATGTGCTTGTGCTGTATCATACCAAGAAAG          | 1840 |
| B. Florida_4_06_p10_cell_HA.seq | 1761 | CCATCTGCTATAAGGAAGATAGGCTCTGATTTCTCTTATTTGATGTGCTTGTGCTGTATCATACCAAGAAAG          | 1840 |
| B. Florida_4_06_p10_egg_HA      | 1761 | CCATCTGCTATAAGGAAGATAGGCTCTGATTTCTCTTATTTGATGTGCTTGTGCTGTATCATACCAAGAAAG          | 1840 |
| B. Florida_4_06_p20_cell_HA     | 1761 | CCATCTGCTATAAGGAAGATAGGCTCTGATTTCTCTTATTTGATGTGCTTGTGCTGTATCATACCAAGAAAG          | 1840 |
| B. Florida_4_06_p20_egg_HA      | 1761 | CCATCTGCTATAAGGAAGATAGGCTCTGATTTCTCTTATTTGATGTGCTTGTGCTGTATCATACCAAGAAAG          | 1840 |
| B. Florida_4_06_parent_HA.seq   | 1841 | GTATTGGAAGAAAT                                                                    | 1860 |
| B. Florida_4_06_p10_cell_HA.seq | 1841 | GTATTGGAAGAAAT                                                                    | 1860 |
| B. Florida_4_06_p10_egg_HA      | 1841 | GTATTGGAAGAAAT                                                                    | 1860 |
| B. Florida_4_06_p20_cell_HA     | 1841 | GTATTGGAAGAAAT                                                                    | 1860 |
| B. Florida_4_06_p20_egg_HA      | 1841 | GTATTGGAAGAAAT                                                                    | 1860 |

Figure S3. Neuraminidase amino acid sequence alignment of B/Florida/06.

|                            |     |                                                                                       |     |
|----------------------------|-----|---------------------------------------------------------------------------------------|-----|
| B_Florida_4_06_parent_NA   | 1   | MLPSTIQTLTLFLTSGGVLLSLYVSASLSYLLYS DILLKFSQTEITAPIMPLDCANASNVAQVNRSAAGVTLLPEPEW       | 80  |
| B_Florida_4_06_p10_cell_NA | 1   | MLPSTIQTLTLFLTSGGVLLSLYVSASLSYLLYS DILLKFSQTEITAPIMPLDCANASNVAQVNRSAAGVTLLPEPEW       | 80  |
| B_Florida_4_06_p10_egg_NA  | 1   | MLPSTIQTLTLFLTSGGVLLSLYVSASLSYLLYS DILLKFSQTEITAPIMPLDCANASNVAQVNRSAAGVTLLPEPEW       | 80  |
| B_Florida_4_06_p20_cell_NA | 1   | MLPSTIQTLTLFLTSGGVLLSLYVSASLSYLLYS DILLKFSQTEITAPIMPLDCANASNVAQVNRSAAGVTLLPEPEW       | 80  |
| B_Florida_4_06_p20_egg_NA  | 1   | MLPSTIQTLTLFLTSGGVLLSLYVSASLSYLLYS DILLKFSQTEITAPIMPLDCANASNVAQVNRSAAGVTLLPEPEW       | 80  |
| B_Florida_4_06_parent_NA   | 81  | TYPRLSCPGSTFQKALLISPHRFGETKGNSAPLIIREPFIACGPTECKHFALTHYAAQPGGYNGTREDRNKLRHLISVK       | 160 |
| B_Florida_4_06_p10_cell_NA | 81  | TYPRLSCPGSTFQKALLISPHRFGETKGNSAPLIIREPFIACGPTECKHFALTHYAAQPGGYNGTREDRNKLRHLISVK       | 160 |
| B_Florida_4_06_p10_egg_NA  | 81  | TYPRLSCPGSTFQKALLISPHRFGETKGNSAPLIIREPFIACGPTECKHFALTHYAAQPGGYNGTREDRNKLRHLISVK       | 160 |
| B_Florida_4_06_p20_cell_NA | 81  | TYPRLSCPGSTFQKALLISPHRFGETKGNSAPLIIREPFIACGPTECKHFALTHYAAQPGGYNGTREDRNKLRHLISVK       | 160 |
| B_Florida_4_06_p20_egg_NA  | 81  | TYPRLSCPGSTFQKALLISPHRFGETKGNSAPLIIREPFIACGPTECKHFALTHYAAQPGGYNGTREDRNKLRHLISVK       | 160 |
| B_Florida_4_06_parent_NA   | 161 | LGKIPTVENSIFHMAAWSGSACHDGKEWTYIGVDGPD SNALLKIKYGEAYTDTYHSYAKNILRTQESACNCIGGDCYLM I    | 240 |
| B_Florida_4_06_p10_cell_NA | 161 | LGKIPTVENSIFHMAAWSGSACHDGKEWTYIGVDGPD SNALLKIKYGEAYTDTYHSYAKNILRTQESACNCIGGDCYLM I    | 240 |
| B_Florida_4_06_p10_egg_NA  | 161 | LGKIPTVENSIFHMAAWSGSACHDGKEWTYIGVDGPD SNALLKIKYGEAYTDTYHSYAKNILRTQESACNCIGGDCYLM I    | 240 |
| B_Florida_4_06_p20_cell_NA | 161 | LGKIPTVENSIFHMAAWSGSACHDGKEWTYIGVDGPD SNALLKIKYGEAYTDTYHSYAKNILRTQESACNCIGGDCYLM I    | 240 |
| B_Florida_4_06_p20_egg_NA  | 161 | LGKIPTVENSIFHMAAWSGSACHDGKEWTYIGVDGPD SNALLKIKYGEAYTDTYHSYAKNILRTQESACNCIGGDCYLM I    | 240 |
| B_Florida_4_06_parent_NA   | 241 | TDGPASGISSECRFLKIREGRIIKEIFPTGRVKHTEECTCGFASNKTI ECACRDNSYTAKRPFVKLVNVEDTDAEIRLMCTE   | 320 |
| B_Florida_4_06_p10_cell_NA | 241 | TDGPASGISSECRFLKIREGRIIKEIFPTGRVKHTEECTCGFASNKTI ECACRDNSYTAKRPFVKLVNVEDTDAEIRLMCTE   | 320 |
| B_Florida_4_06_p10_egg_NA  | 241 | TDGPASGISSECRFLKIREGRIIKEIFPTGRVKHTEECTCGFASNKTI ECACRDNSYTAKRPFVKLVNVEDTDAEIRLMCTE   | 320 |
| B_Florida_4_06_p20_cell_NA | 241 | TDGPASGISSECRFLKIREGRIIKEIFPTGRVKHTEECTCGFASNKTI ECACRDNSYTAKRPFVKLVNVEDTDAEIRLMCTE   | 320 |
| B_Florida_4_06_p20_egg_NA  | 241 | TDGPASGISSECRFLKIREGRIIKEIFPTGRVKHTEECTCGFASNKTI ECACRDNSYTAKRPFVKLVNVEDTDAEIRLMCTE   | 320 |
| B_Florida_4_06_parent_NA   | 321 | TYLDTPRPNDGSI TGPCESDGDKGSGG IKGGFVHQRMASK IGRWYSRTMSKTKRMGMGLYVKYDGD PWTDS EALALSGVM | 400 |
| B_Florida_4_06_p10_cell_NA | 321 | TYLDTPRPNDGSI TGPCESDGDKGSGG IKGGFVHQRMASK IGRWYSRTMSKTKRMGMGLYVKYDGD PWTDS EALALSGVM | 400 |
| B_Florida_4_06_p10_egg_NA  | 321 | TYLDTPRPNDGSI TGPCESDGDKGSGG IKGGFVHQRMASK IGRWYSRTMSKTKRMGMGLYVKYDGD PWTDS EALALSGVM | 400 |
| B_Florida_4_06_p20_cell_NA | 321 | TYLDTPRPNDGSI TGPCESDGDKGSGG IKGGFVHQRMASK IGRWYSRTMSKTKRMGMGLYVKYDGD PWTDS EALALSGVM | 400 |
| B_Florida_4_06_p20_egg_NA  | 321 | TYLDTPRPNDGSI TGPCESDGDKGSGG IKGGFVHQRMASK IGRWYSRTMSKTKRMGMGLYVKYDGD PWTDS EALALSGVM | 400 |
| B_Florida_4_06_parent_NA   | 401 | VSMEEPGWYSFGFEIKDKKCDVPCIGIEMVHDG GKT TW HSAATAIYCLMGSGQLLWDVTGTGVDMAI*               | 467 |
| B_Florida_4_06_p10_cell_NA | 401 | VSMEEPGWYSFGFEIKDKKCDVPCIGIEMVHDG GKT TW HSAATAIYCLMGSGQLLWDVTGTGVDMAI*               | 467 |
| B_Florida_4_06_p10_egg_NA  | 401 | VSMEEPGWYSFGFEIKDKKCDVPCIGIEMVHDG GKT TW HSAATAIYCLMGSGQLLWDVTGTGVDMAI*               | 467 |
| B_Florida_4_06_p20_cell_NA | 401 | VSMEEPGWYSFGFEIKDKKCDVPCIGIEMVHDG GKT TW HSAATAIYCLMGSGQLLWDVTGTGVDMAI*               | 467 |
| B_Florida_4_06_p20_egg_NA  | 401 | VSMEEPGWYSFGFEIKDKKCDVPCIGIEMVHDG GKT TW HSAATAIYCLMGSGQLLWDVTGTGVDMAI*               | 467 |

Figure S4. Neuraminidase nucleotide sequence alignment of B/Florida/06.

|                               |      |                                                                                    |      |
|-------------------------------|------|------------------------------------------------------------------------------------|------|
| B_Florida_4_06_parent_NA      | 1    | ATCTTCTCAAAACTGAGGCAAATAGGCCAAAAATGAACAATGCTACCTTCAACATACAAAGCTTAACCTATTCTCTAC     | 80   |
| B_Florida_4_06_p10_cell_NA    | 1    | ATCTTCTCAAAACTGAGGCAAATAGGCCAAAAATGAACAATGCTACCTTCAACATACAAAGCTTAACCTATTCTCTAC     | 80   |
| B_Florida_4_06_p10_egg_NA.seq | 1    | ATCTTCTCAAAACTGAGGCAAATAGGCCAAAAATGAACAATGCTACCTTCAACATACAAAGCTTAACCTATTCTCTAC     | 80   |
| B_Florida_4_06_p20_cell_NA    | 1    | ATCTTCTCAAAACTGAGGCAAATAGGCCAAAAATGAACAATGCTACCTTCAACATACAAAGCTTAACCTATTCTCTAC     | 80   |
| B_Florida_4_06_p20_egg_NA     | 1    | ATCTTCTCAAAACTGAGGCAAATAGGCCAAAAATGAACAATGCTACCTTCAACATACAAAGCTTAACCTATTCTCTAC     | 80   |
| B_Florida_4_06_parent_NA      | 81   | ATCAGGGGGAGTGTATTATCACTATATGTGTGACGTCATATGTCATCTACTATATTCGGATATATTGCTAAATTTT       | 160  |
| B_Florida_4_06_p10_cell_NA    | 81   | ATCAGGGGGAGTGTATTATCACTATATGTGTGACGTCATATGTCATCTACTATATTCGGATATATTGCTAAATTTT       | 160  |
| B_Florida_4_06_p10_egg_NA.seq | 81   | ATCAGGGGGAGTGTATTATCACTATATGTGTGACGTCATATGTCATCTACTATATTCGGATATATTGCTAAATTTT       | 160  |
| B_Florida_4_06_p20_cell_NA    | 81   | ATCAGGGGGAGTGTATTATCACTATATGTGTGACGTCATATGTCATCTACTATATTCGGATATATTGCTAAATTTT       | 160  |
| B_Florida_4_06_p20_egg_NA     | 81   | ATCAGGGGGAGTGTATTATCACTATATGTGTGACGTCATATGTCATCTACTATATTCGGATATATTGCTAAATTTT       | 160  |
| B_Florida_4_06_parent_NA      | 161  | ACACAAACAGAAATAACTGACACCAATAATGCCATTGGATTGTGCAAAAGCATCAAAATGTCAGGCTGTGAACCGTTCTGCA | 240  |
| B_Florida_4_06_p10_cell_NA    | 161  | ACACAAACAGAAATAACTGACACCAATAATGCCATTGGATTGTGCAAAAGCATCAAAATGTCAGGCTGTGAACCGTTCTGCA | 240  |
| B_Florida_4_06_p10_egg_NA.seq | 161  | ACACAAACAGAAATAACTGACACCAATAATGCCATTGGATTGTGCAAAAGCATCAAAATGTCAGGCTGTGAACCGTTCTGCA | 240  |
| B_Florida_4_06_p20_cell_NA    | 161  | ACACAAACAGAAATAACTGACACCAATAATGCCATTGGATTGTGCAAAAGCATCAAAATGTCAGGCTGTGAACCGTTCTGCA | 240  |
| B_Florida_4_06_p20_egg_NA     | 161  | ACACAAACAGAAATAACTGACACCAATAATGCCATTGGATTGTGCAAAAGCATCAAAATGTCAGGCTGTGAACCGTTCTGCA | 240  |
| B_Florida_4_06_parent_NA      | 241  | BCAAAAGGGGTGACACTTCTTCTCCAGAACCGGAGTGGAACATACCTCGTTTATCTTGCCCGGGCTCAACCTTTTCAGAA   | 320  |
| B_Florida_4_06_p10_cell_NA    | 241  | BCAAAAGGGGTGACACTTCTTCTCCAGAACCGGAGTGGAACATACCTCGTTTATCTTGCCCGGGCTCAACCTTTTCAGAA   | 320  |
| B_Florida_4_06_p10_egg_NA.seq | 241  | BCAAAAGGGGTGACACTTCTTCTCCAGAACCGGAGTGGAACATACCTCGTTTATCTTGCCCGGGCTCAACCTTTTCAGAA   | 320  |
| B_Florida_4_06_p20_cell_NA    | 241  | BCAAAAGGGGTGACACTTCTTCTCCAGAACCGGAGTGGAACATACCTCGTTTATCTTGCCCGGGCTCAACCTTTTCAGAA   | 320  |
| B_Florida_4_06_p20_egg_NA     | 241  | BCAAAAGGGGTGACACTTCTTCTCCAGAACCGGAGTGGAACATACCTCGTTTATCTTGCCCGGGCTCAACCTTTTCAGAA   | 320  |
| B_Florida_4_06_parent_NA      | 321  | AGCACTCTCTAATAGCCCTCATAGATTGCGAGAAACCAAGGAACATCAAGTCCCTGTATAATAAAGGGAACCTTTTATTTG  | 400  |
| B_Florida_4_06_p10_cell_NA    | 321  | AGCACTCTCTAATAGCCCTCATAGATTGCGAGAAACCAAGGAACATCAAGTCCCTGTATAATAAAGGGAACCTTTTATTTG  | 400  |
| B_Florida_4_06_p10_egg_NA.seq | 321  | AGCACTCTCTAATAGCCCTCATAGATTGCGAGAAACCAAGGAACATCAAGTCCCTGTATAATAAAGGGAACCTTTTATTTG  | 400  |
| B_Florida_4_06_p20_cell_NA    | 321  | AGCACTCTCTAATAGCCCTCATAGATTGCGAGAAACCAAGGAACATCAAGTCCCTGTATAATAAAGGGAACCTTTTATTTG  | 400  |
| B_Florida_4_06_p20_egg_NA     | 321  | AGCACTCTCTAATAGCCCTCATAGATTGCGAGAAACCAAGGAACATCAAGTCCCTGTATAATAAAGGGAACCTTTTATTTG  | 400  |
| B_Florida_4_06_parent_NA      | 401  | CTTTGTGGACCAACGGAATGCAAACTTTGCTCTAACCATATATGCAAGTCAACAGGGGGATACATACATGGAACAGAA     | 480  |
| B_Florida_4_06_p10_cell_NA    | 401  | CTTTGTGGACCAACGGAATGCAAACTTTGCTCTAACCATATATGCAAGTCAACAGGGGGATACATACATGGAACAGAA     | 480  |
| B_Florida_4_06_p10_egg_NA.seq | 401  | CTTTGTGGACCAACGGAATGCAAACTTTGCTCTAACCATATATGCAAGTCAACAGGGGGATACATACATGGAACAGAA     | 480  |
| B_Florida_4_06_p20_cell_NA    | 401  | CTTTGTGGACCAACGGAATGCAAACTTTGCTCTAACCATATATGCAAGTCAACAGGGGGATACATACATGGAACAGAA     | 480  |
| B_Florida_4_06_p20_egg_NA     | 401  | CTTTGTGGACCAACGGAATGCAAACTTTGCTCTAACCATATATGCAAGTCAACAGGGGGATACATACATGGAACAGAA     | 480  |
| B_Florida_4_06_parent_NA      | 481  | BAGACAGAAACAGCTGAGGCATCTAATTTCAGTCAATTTGGGCAAAATCCCAACAGTAGAAAACTCCATTTCCTCAT      | 560  |
| B_Florida_4_06_p10_cell_NA    | 481  | BAGACAGAAACAGCTGAGGCATCTAATTTCAGTCAATTTGGGCAAAATCCCAACAGTAGAAAACTCCATTTCCTCAT      | 560  |
| B_Florida_4_06_p10_egg_NA.seq | 481  | BAGACAGAAACAGCTGAGGCATCTAATTTCAGTCAATTTGGGCAAAATCCCAACAGTAGAAAACTCCATTTCCTCAT      | 560  |
| B_Florida_4_06_p20_cell_NA    | 481  | BAGACAGAAACAGCTGAGGCATCTAATTTCAGTCAATTTGGGCAAAATCCCAACAGTAGAAAACTCCATTTCCTCAT      | 560  |
| B_Florida_4_06_p20_egg_NA     | 481  | BAGACAGAAACAGCTGAGGCATCTAATTTCAGTCAATTTGGGCAAAATCCCAACAGTAGAAAACTCCATTTCCTCAT      | 560  |
| B_Florida_4_06_parent_NA      | 561  | GGCAGCTTTGGAGCGGTCGCTATGCCATGATGTTAAGAAATGGACATATATCGGAATGTATGCCCCGACAGTAATGCAT    | 640  |
| B_Florida_4_06_p10_cell_NA    | 561  | GGCAGCTTTGGAGCGGTCGCTATGCCATGATGTTAAGAAATGGACATATATCGGAATGTATGCCCCGACAGTAATGCAT    | 640  |
| B_Florida_4_06_p10_egg_NA.seq | 561  | GGCAGCTTTGGAGCGGTCGCTATGCCATGATGTTAAGAAATGGACATATATCGGAATGTATGCCCCGACAGTAATGCAT    | 640  |
| B_Florida_4_06_p20_cell_NA    | 561  | GGCAGCTTTGGAGCGGTCGCTATGCCATGATGTTAAGAAATGGACATATATCGGAATGTATGCCCCGACAGTAATGCAT    | 640  |
| B_Florida_4_06_p20_egg_NA     | 561  | GGCAGCTTTGGAGCGGTCGCTATGCCATGATGTTAAGAAATGGACATATATCGGAATGTATGCCCCGACAGTAATGCAT    | 640  |
| B_Florida_4_06_parent_NA      | 641  | TACTCAAAATAAAATATGGGAAGCATATACTGAACATACCATCTCTATGCAAAAACATCTTGAAGGACACAGAAAGT      | 720  |
| B_Florida_4_06_p10_cell_NA    | 641  | TACTCAAAATAAAATATGGGAAGCATATACTGAACATACCATCTCTATGCAAAAACATCTTGAAGGACACAGAAAGT      | 720  |
| B_Florida_4_06_p10_egg_NA.seq | 641  | TACTCAAAATAAAATATGGGAAGCATATACTGAACATACCATCTCTATGCAAAAACATCTTGAAGGACACAGAAAGT      | 720  |
| B_Florida_4_06_p20_cell_NA    | 641  | TACTCAAAATAAAATATGGGAAGCATATACTGAACATACCATCTCTATGCAAAAACATCTTGAAGGACACAGAAAGT      | 720  |
| B_Florida_4_06_p20_egg_NA     | 641  | TACTCAAAATAAAATATGGGAAGCATATACTGAACATACCATCTCTATGCAAAAACATCTTGAAGGACACAGAAAGT      | 720  |
| B_Florida_4_06_parent_NA      | 721  | BCCTGCAATTTGCATCGGGGAGATGTTTATCTATGATGAATGATGGCCAGCTTCAAGGATTAGTGAATGCAGATTCCT     | 800  |
| B_Florida_4_06_p10_cell_NA    | 721  | BCCTGCAATTTGCATCGGGGAGATGTTTATCTATGATGAATGATGGCCAGCTTCAAGGATTAGTGAATGCAGATTCCT     | 800  |
| B_Florida_4_06_p10_egg_NA.seq | 721  | BCCTGCAATTTGCATCGGGGAGATGTTTATCTATGATGAATGATGGCCAGCTTCAAGGATTAGTGAATGCAGATTCCT     | 800  |
| B_Florida_4_06_p20_cell_NA    | 721  | BCCTGCAATTTGCATCGGGGAGATGTTTATCTATGATGAATGATGGCCAGCTTCAAGGATTAGTGAATGCAGATTCCT     | 800  |
| B_Florida_4_06_p20_egg_NA     | 721  | BCCTGCAATTTGCATCGGGGAGATGTTTATCTATGATGAATGATGGCCAGCTTCAAGGATTAGTGAATGCAGATTCCT     | 800  |
| B_Florida_4_06_parent_NA      | 801  | TAAGATTCGAGAGGGCGCAATAATAAAGAAATATTTCCAACAGGAAGATGAAACATCTGAGGAATGCACATCGGAT       | 880  |
| B_Florida_4_06_p10_cell_NA    | 801  | TAAGATTCGAGAGGGCGCAATAATAAAGAAATATTTCCAACAGGAAGATGAAACATCTGAGGAATGCACATCGGAT       | 880  |
| B_Florida_4_06_p10_egg_NA.seq | 801  | TAAGATTCGAGAGGGCGCAATAATAAAGAAATATTTCCAACAGGAAGATGAAACATCTGAGGAATGCACATCGGAT       | 880  |
| B_Florida_4_06_p20_cell_NA    | 801  | TAAGATTCGAGAGGGCGCAATAATAAAGAAATATTTCCAACAGGAAGATGAAACATCTGAGGAATGCACATCGGAT       | 880  |
| B_Florida_4_06_p20_egg_NA     | 801  | TAAGATTCGAGAGGGCGCAATAATAAAGAAATATTTCCAACAGGAAGATGAAACATCTGAGGAATGCACATCGGAT       | 880  |
| B_Florida_4_06_parent_NA      | 881  | TGCCAGCAACAAACATAGAAATGTGCTTGTAGAGATAACAGTTACACAGCAAAAAGACCTTTGTCAAAATTAATGTG      | 960  |
| B_Florida_4_06_p10_cell_NA    | 881  | TGCCAGCAACAAACATAGAAATGTGCTTGTAGAGATAACAGTTACACAGCAAAAAGACCTTTGTCAAAATTAATGTG      | 960  |
| B_Florida_4_06_p10_egg_NA.seq | 881  | TGCCAGCAACAAACATAGAAATGTGCTTGTAGAGATAACAGTTACACAGCAAAAAGACCTTTGTCAAAATTAATGTG      | 960  |
| B_Florida_4_06_p20_cell_NA    | 881  | TGCCAGCAACAAACATAGAAATGTGCTTGTAGAGATAACAGTTACACAGCAAAAAGACCTTTGTCAAAATTAATGTG      | 960  |
| B_Florida_4_06_p20_egg_NA     | 881  | TGCCAGCAACAAACATAGAAATGTGCTTGTAGAGATAACAGTTACACAGCAAAAAGACCTTTGTCAAAATTAATGTG      | 960  |
| B_Florida_4_06_parent_NA      | 961  | BAGACTGATACAGCGGAAATAAGATTTGATGTGCACAGAGACTTATTGGACACCCAGACCAAATGTGGAAGCATAC       | 1040 |
| B_Florida_4_06_p10_cell_NA    | 961  | BAGACTGATACAGCGGAAATAAGATTTGATGTGCACAGAGACTTATTGGACACCCAGACCAAATGTGGAAGCATAC       | 1040 |
| B_Florida_4_06_p10_egg_NA.seq | 961  | BAGACTGATACAGCGGAAATAAGATTTGATGTGCACAGAGACTTATTGGACACCCAGACCAAATGTGGAAGCATAC       | 1040 |
| B_Florida_4_06_p20_cell_NA    | 961  | BAGACTGATACAGCGGAAATAAGATTTGATGTGCACAGAGACTTATTGGACACCCAGACCAAATGTGGAAGCATAC       | 1040 |
| B_Florida_4_06_p20_egg_NA     | 961  | BAGACTGATACAGCGGAAATAAGATTTGATGTGCACAGAGACTTATTGGACACCCAGACCAAATGTGGAAGCATAC       | 1040 |
| B_Florida_4_06_parent_NA      | 1041 | AGGGCCTTGCGAATCTGATGGGGCAAAAGGAGTGGAGGCTCAAGGGAGGATTTGTTTCATCAAGGAATGGCATCAAGA     | 1120 |
| B_Florida_4_06_p10_cell_NA    | 1041 | AGGGCCTTGCGAATCTGATGGGGCAAAAGGAGTGGAGGCTCAAGGGAGGATTTGTTTCATCAAGGAATGGCATCAAGA     | 1120 |
| B_Florida_4_06_p10_egg_NA.seq | 1041 | AGGGCCTTGCGAATCTGATGGGGCAAAAGGAGTGGAGGCTCAAGGGAGGATTTGTTTCATCAAGGAATGGCATCAAGA     | 1120 |
| B_Florida_4_06_p20_cell_NA    | 1041 | AGGGCCTTGCGAATCTGATGGGGCAAAAGGAGTGGAGGCTCAAGGGAGGATTTGTTTCATCAAGGAATGGCATCAAGA     | 1120 |
| B_Florida_4_06_p20_egg_NA     | 1041 | AGGGCCTTGCGAATCTGATGGGGCAAAAGGAGTGGAGGCTCAAGGGAGGATTTGTTTCATCAAGGAATGGCATCAAGA     | 1120 |
| B_Florida_4_06_parent_NA      | 1121 | TGGAAGGTGGTACTCTCGAACGATGCTTAAACATAAAGAAATGGGATGGGACTGTATGAAAGTATGATGGAGACCA       | 1200 |
| B_Florida_4_06_p10_cell_NA    | 1121 | TGGAAGGTGGTACTCTCGAACGATGCTTAAACATAAAGAAATGGGATGGGACTGTATGAAAGTATGATGGAGACCA       | 1200 |
| B_Florida_4_06_p10_egg_NA.seq | 1121 | TGGAAGGTGGTACTCTCGAACGATGCTTAAACATAAAGAAATGGGATGGGACTGTATGAAAGTATGATGGAGACCA       | 1200 |
| B_Florida_4_06_p20_cell_NA    | 1121 | TGGAAGGTGGTACTCTCGAACGATGCTTAAACATAAAGAAATGGGATGGGACTGTATGAAAGTATGATGGAGACCA       | 1200 |
| B_Florida_4_06_p20_egg_NA     | 1121 | TGGAAGGTGGTACTCTCGAACGATGCTTAAACATAAAGAAATGGGATGGGACTGTATGAAAGTATGATGGAGACCA       | 1200 |
| B_Florida_4_06_parent_NA      | 1201 | TGGACTGACAGTGAAGCCCTTGCTCTTAGTGGAGTAAATGTTTCGATGGAAGAACCTGGTGGTATTCCTTTGGCTTCGA    | 1280 |
| B_Florida_4_06_p10_cell_NA    | 1201 | TGGACTGACAGTGAAGCCCTTGCTCTTAGTGGAGTAAATGTTTCGATGGAAGAACCTGGTGGTATTCCTTTGGCTTCGA    | 1280 |
| B_Florida_4_06_p10_egg_NA.seq | 1201 | TGGACTGACAGTGAAGCCCTTGCTCTTAGTGGAGTAAATGTTTCGATGGAAGAACCTGGTGGTATTCCTTTGGCTTCGA    | 1280 |
| B_Florida_4_06_p20_cell_NA    | 1201 | TGGACTGACAGTGAAGCCCTTGCTCTTAGTGGAGTAAATGTTTCGATGGAAGAACCTGGTGGTATTCCTTTGGCTTCGA    | 1280 |
| B_Florida_4_06_p20_egg_NA     | 1201 | TGGACTGACAGTGAAGCCCTTGCTCTTAGTGGAGTAAATGTTTCGATGGAAGAACCTGGTGGTATTCCTTTGGCTTCGA    | 1280 |
| B_Florida_4_06_parent_NA      | 1281 | ATAAAGAGATAAGAAATGTGATGCTCCCTGATTTGGGATAGAAATGGTACATGATGGTGGGAAACAGCTTGGCACTCAG    | 1360 |
| B_Florida_4_06_p10_cell_NA    | 1281 | ATAAAGAGATAAGAAATGTGATGCTCCCTGATTTGGGATAGAAATGGTACATGATGGTGGGAAACAGCTTGGCACTCAG    | 1360 |
| B_Florida_4_06_p10_egg_NA.seq | 1281 | ATAAAGAGATAAGAAATGTGATGCTCCCTGATTTGGGATAGAAATGGTACATGATGGTGGGAAACAGCTTGGCACTCAG    | 1360 |
| B_Florida_4_06_p20_cell_NA    | 1281 | ATAAAGAGATAAGAAATGTGATGCTCCCTGATTTGGGATAGAAATGGTACATGATGGTGGGAAACAGCTTGGCACTCAG    | 1360 |
| B_Florida_4_06_p20_egg_NA     | 1281 | ATAAAGAGATAAGAAATGTGATGCTCCCTGATTTGGGATAGAAATGGTACATGATGGTGGGAAACAGCTTGGCACTCAG    | 1360 |
| B_Florida_4_06_parent_NA      | 1361 | CAGCAACAGCCATTACTGTTTAATGGGCTCAGGACAACTGCTGGGACACTGTACAGGTTGTGATATGGCTCTGTAA       | 1440 |
| B_Florida_4_06_p10_cell_NA    | 1361 | CAGCAACAGCCATTACTGTTTAATGGGCTCAGGACAACTGCTGGGACACTGTACAGGTTGTGATATGGCTCTGTAA       | 1440 |
| B_Florida_4_06_p10_egg_NA.seq | 1361 | CAGCAACAGCCATTACTGTTTAATGGGCTCAGGACAACTGCTGGGACACTGTACAGGTTGTGATATGGCTCTGTAA       | 1440 |
| B_Florida_4_06_p20_cell_NA    | 1361 | CAGCAACAGCCATTACTGTTTAATGGGCTCAGGACAACTGCTGGGACACTGTACAGGTTGTGATATGGCTCTGTAA       | 1440 |
| B_Florida_4_06_p20_egg_NA     | 1361 | CAGCAACAGCCATTACTGTTTAATGGGCTCAGGACAACTGCTGGGACACTGTACAGGTTGTGATATGGCTCTGTAA       | 1440 |
| B_Florida_4_06_parent_NA      | 1441 | TGGAGGAATGGTGTAGTCTGTTCTAAACCCCTTTGTTCCATTGTTTGTGAACAAATGTCTTACTGAGCTTAATGTGTTT    | 1520 |
| B_Florida_4_06_p10_cell_NA    | 1441 | TGGAGGAATGGTGTAGTCTGTTCTAAACCCCTTTGTTCCATTGTTTGTGAACAAATGTCTTACTGAGCTTAATGTGTTT    | 1520 |
| B_Florida_4_06_p10_egg_NA.seq | 1441 | TGGAGGAATGGTGTAGTCTGTTCTAAACCCCTTTGTTCCATTGTTTGTGAACAAATGTCTTACTGAGCTTAATGTGTTT    | 1520 |
| B_Florida_4_06_p20_cell_NA    | 1441 | TGGAGGAATGGTGTAGTCTGTTCTAAACCCCTTTGTTCCATTGTTTGTGAACAAATGTCTTACTGAGCTTAATGTGTTT    | 1520 |
| B_Florida_4_06_p20_egg_NA     | 1441 | TGGAGGAATGGTGTAGTCTGTTCTAAACCCCTTTGTTCCATTGTTTGTGAACAAATGTCTTACTGAGCTTAATGTGTTT    | 1520 |
| B_Florida_4_06_parent_NA      | 1521 | TGAAAAAT 1528                                                                      |      |
| B_Florida_4_06_p10_cell_NA    | 1521 | TGAAAAAT 1528                                                                      |      |
| B_Florida_4_06_p10_egg_NA.seq | 1521 | TGAAAAAT 1528                                                                      |      |
| B_Florida_4_06_p20_cell_NA    | 1521 | TGAAAAAT 1528                                                                      |      |
| B_Florida_4_06_p20_egg_NA     | 1521 | TGAAAAAT 1528                                                                      |      |
